# Supplementary material
Source: Springer Nature journal article supplement (https://www.springermedizin.de/resource/supplementary/13045_2010_94_MOESM3_ESM.pdf/9660640)

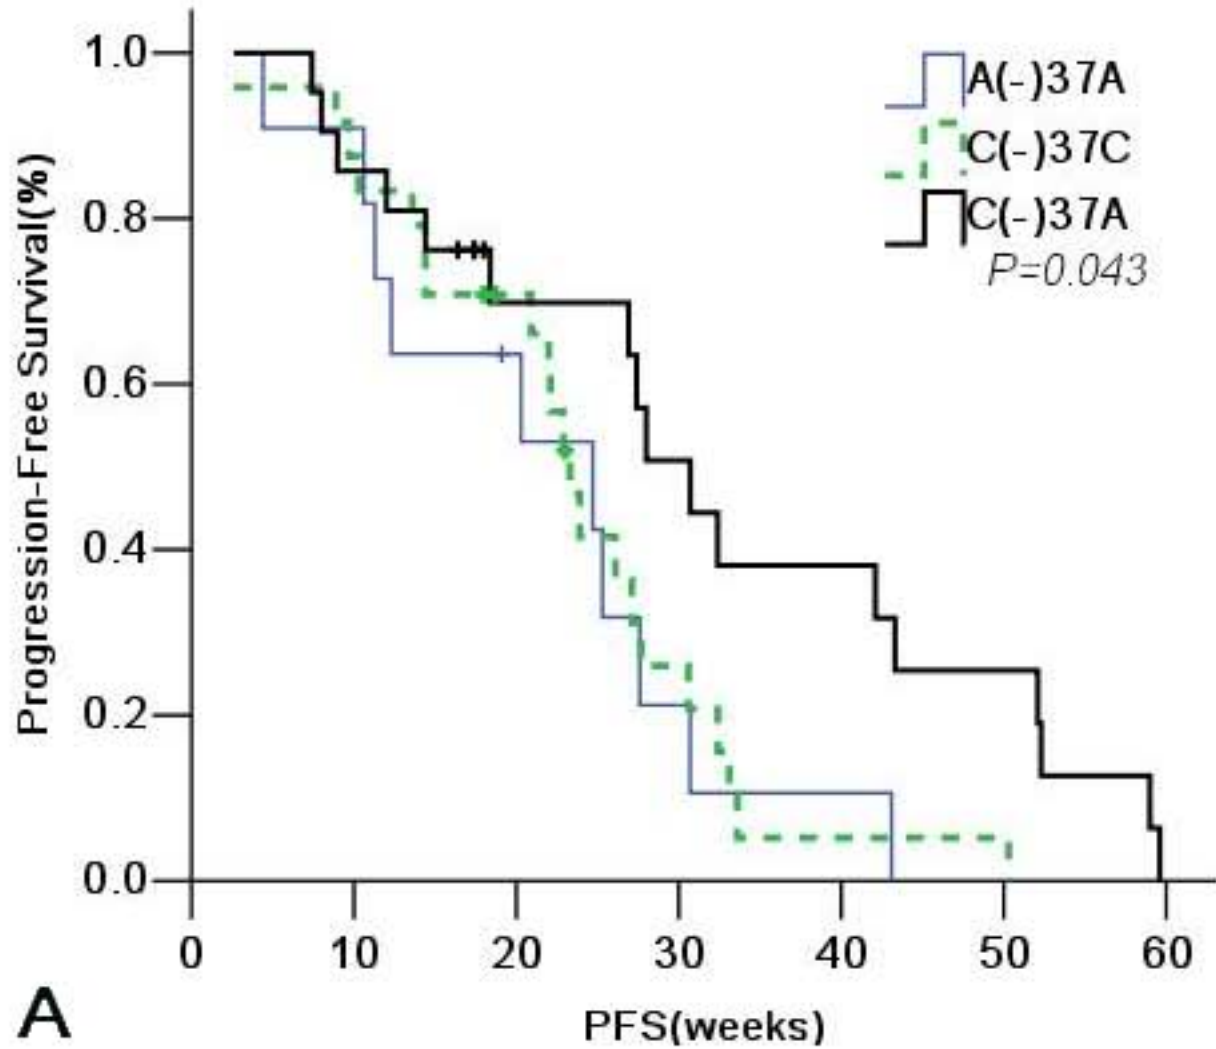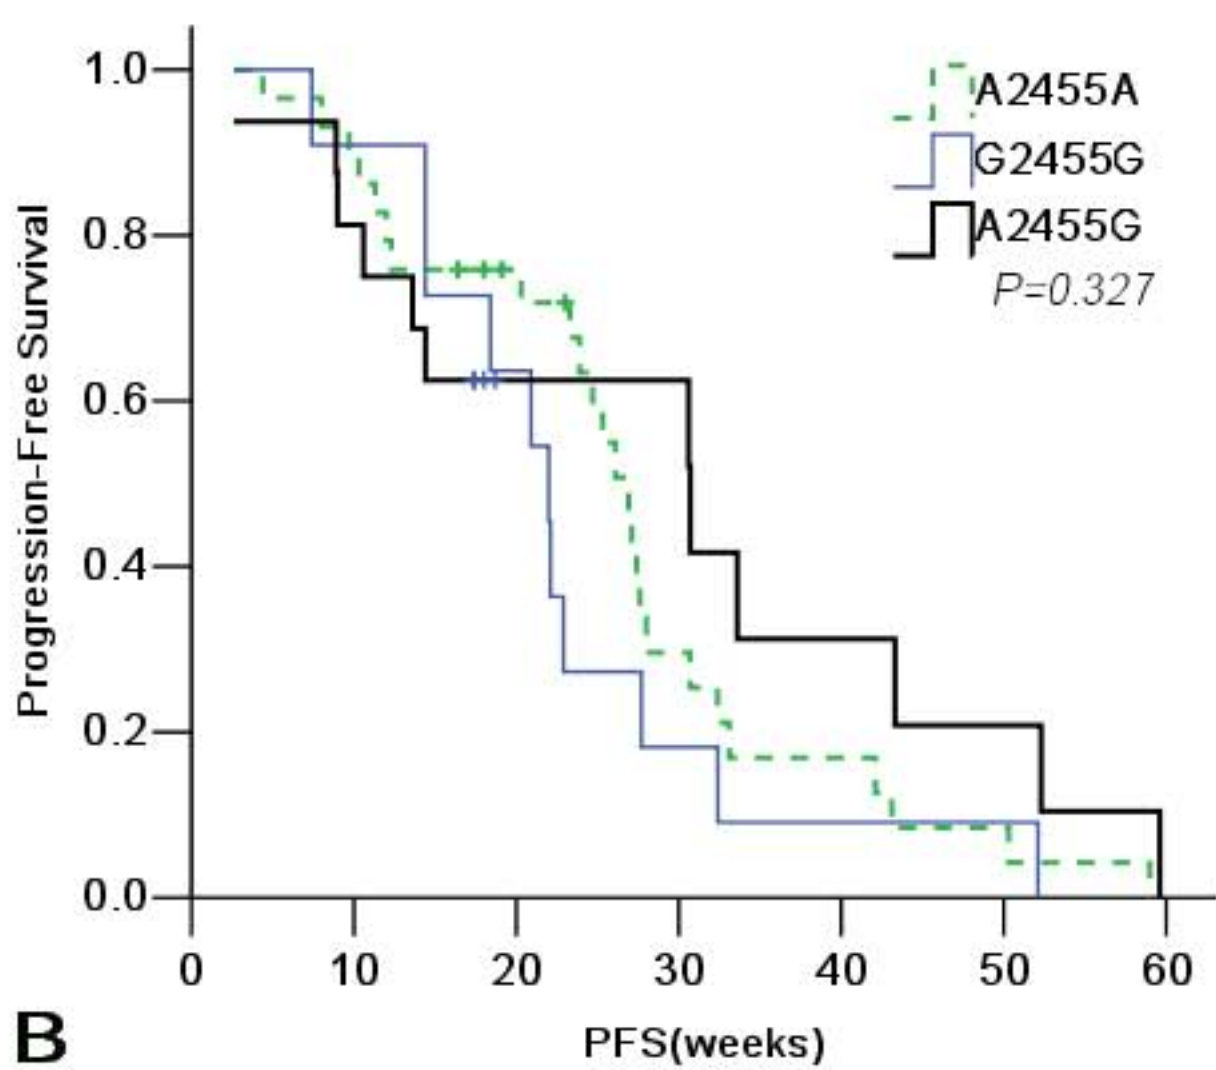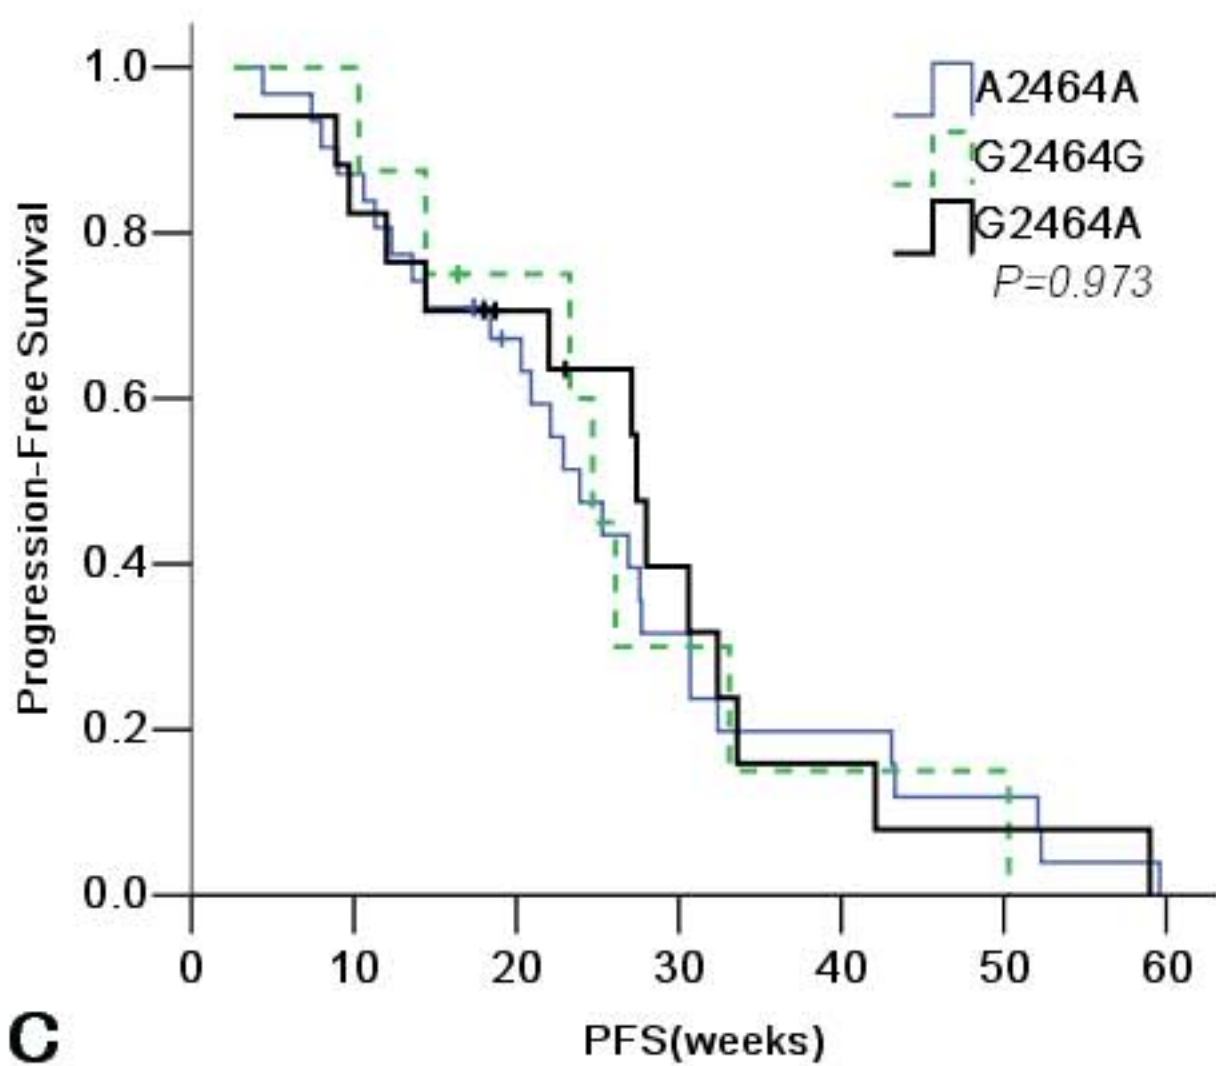

Supplement: MOESM3 [file 9660640]
